# Supplementary material for: miRNAs as Biomolecular Markers for Food Safety, Quality, and Traceability in Poultry Meat—A Preliminary Study
Source: MDPI journal article supplement (doi:10.3390/molecules29040748), 2024-02-06
Supplement: s1 [file s1]

### Supplementary Materials:

1. **Table S1.** Expression of 2 housekeeping genes (U6 and 5S) in the muscle (A), lung (B), spleen (C) tissues for the two breeds (R308 and RG).
2. **Table S2:** Relative expression of miR-21 and miR-126 in muscle, lung and spleen tissues for R308 and RG.

# 1. Table S1.

## A. Expression of 2 housekeeping genes (U6 and 5S) in the muscle tissues for the two breeds (R308 and RG).

**Muscle** Ct are average values of 3 technical replicates. The experiment was conducted twice.

| U6 snRNA |         |            |      |
|----------|---------|------------|------|
|          |         | Ct Average | SD   |
| R308     | cDNA 1  | 27,72      | 0,17 |
| R308     | cDNA 2  | 26,90      | 0,04 |
| R308     | cDNA 3  | 29,50      | 0,14 |
| R308     | cDNA 4  | 28,51      | 0,28 |
| R308     | cDNA 5  | 29,29      | 0,17 |
| R308     | cDNA 6  | 27,22      | 0,09 |
| RG       | cDNA 7  | 29,13      | 0,12 |
| RG       | cDNA 8  | 27,65      | 0,15 |
| RG       | cDNA 9  | 27,85      | 0,16 |
| RG       | cDNA 10 | 26,70      | 0,08 |
| RG       | cDNA 11 | 28,33      | 0,06 |

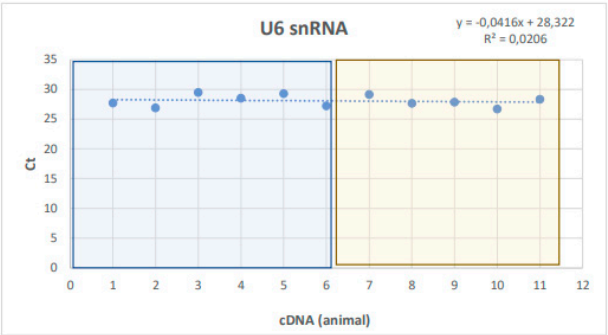

| 5S rRNA |         |            |      |
|---------|---------|------------|------|
|         |         | Ct Average | SD   |
| R308    | cDNA 1  | 20,91      | 0,13 |
| R308    | cDNA 2  | 19,65      | 0,03 |
| R308    | cDNA 3  | 20,33      | 0,10 |
| R308    | cDNA 4  | 19,72      | 0,13 |
| R308    | cDNA 5  | 20,77      | 0,15 |
| R308    | cDNA 6  | 19,52      | 0,05 |
| RG      | cDNA 7  | 21,02      | 0,06 |
| RG      | cDNA 8  | 20,82      | 0,09 |
| RG      | cDNA 9  | 20,96      | 0,01 |
| RG      | cDNA 10 | 19,97      | 0,08 |
| RG      | cDNA 11 | 20,17      | 0,09 |

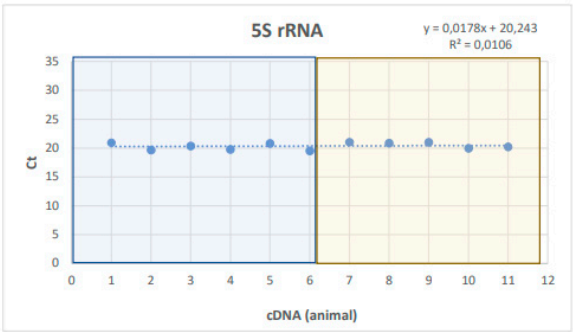

## B. Expression of 2 housekeeping genes (U6 and 5S) in the lung tissues for the two breeds (R308 and RG).

**Lung** Ct are average values of 3 technical replicates. The experiment was conducted twice.

| U6 snRNA |         |            |      |
|----------|---------|------------|------|
|          |         | Ct Average | SD   |
| R308     | cDNA 1  | 19,59      | 0,02 |
| R308     | cDNA 2  | 20,19      | 0,04 |
| R308     | cDNA 3  | 21,35      | 0,05 |
| R308     | cDNA 4  | 20,25      | 0,08 |
| R308     | cDNA 5  | 20,66      | 0,03 |
| R308     | cDNA 6  | 20,57      | 0,13 |
| RG       | cDNA 7  | 21,03      | 0,10 |
| RG       | cDNA 8  | 21,17      | 0,09 |
| RG       | cDNA 9  | 21,92      | 0,04 |
| RG       | cDNA 10 | 20,60      | 0,09 |
| RG       | cDNA 11 | 20,93      | 0,10 |

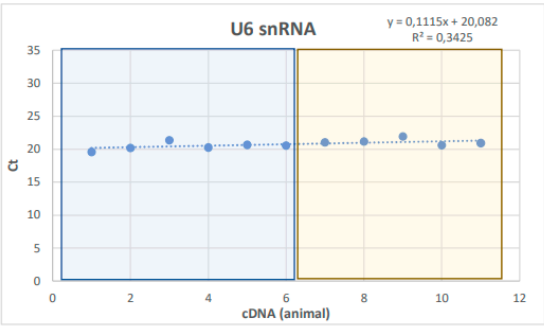

| 5S rRNA |         |            |      |
|---------|---------|------------|------|
|         |         | Ct Average | SD   |
| R308    | cDNA 1  | 18,82      | 0,21 |
| R308    | cDNA 2  | 19,77      | 0,14 |
| R308    | cDNA 3  | 18,83      | 0,01 |
| R308    | cDNA 4  | 20,33      | 0,07 |
| R308    | cDNA 5  | 20,46      | 0,21 |
| R308    | cDNA 6  | 19,66      | 0,03 |
| RG      | cDNA 7  | 19,91      | 0,12 |
| RG      | cDNA 8  | 20,50      | 0,20 |
| RG      | cDNA 9  | 20,67      | 0,14 |
| RG      | cDNA 10 | 19,75      | 0,09 |
| RG      | cDNA 11 | 19,78      | 0,03 |

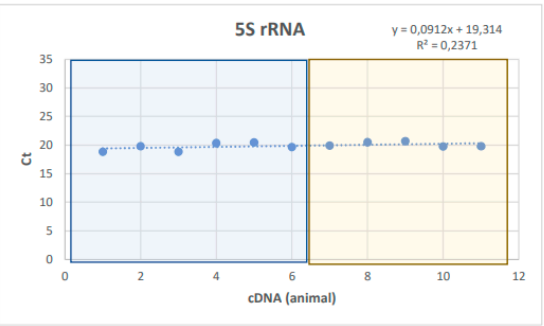

C. Expression of 2 housekeeping genes (U6 and 5S) in the spleen tissues for the two breeds (R308 and RG).

**Spleen** Ct are average values of 3 technical replicates. The experiment was conducted twice.

| U6 snRNA |         |            |      |
|----------|---------|------------|------|
|          |         | Ct Average | SD   |
| R308     | cDNA 1  | 14,93      | 0,14 |
| R308     | cDNA 2  | 14,70      | 0,03 |
| R308     | cDNA 3  | 15,59      | 0,02 |
| R308     | cDNA 4  | 14,70      | 0,20 |
| R308     | cDNA 5  | 15,83      | 0,25 |
| R308     | cDNA 6  | 15,33      | 0,11 |
| RG       | cDNA 7  | 15,80      | 0,09 |
| RG       | cDNA 8  | 15,27      | 0,11 |
| RG       | cDNA 9  | 15,31      | 0,05 |
| RG       | cDNA 10 | 15,26      | 0,05 |
| RG       | cDNA 11 | 14,97      | 0,11 |

| 5S rRNA |         |            |      |
|---------|---------|------------|------|
|         |         | Ct Average | SD   |
| R308    | cDNA 1  | 19,96      | 0,21 |
| R308    | cDNA 2  | 18,95      | 0,05 |
| R308    | cDNA 3  | 18,98      | 0,11 |
| R308    | cDNA 4  | 18,70      | 0,13 |
| R308    | cDNA 5  | 20,58      | 0,26 |
| R308    | cDNA 6  | 18,90      | 0,11 |
| RG      | cDNA 7  | 19,88      | 0,04 |
| RG      | cDNA 8  | 20,50      | 0,28 |
| RG      | cDNA 9  | 19,92      | 0,17 |
| RG      | cDNA 10 | 18,98      | 0,09 |
| RG      | cDNA 11 | 19,85      | 0,18 |

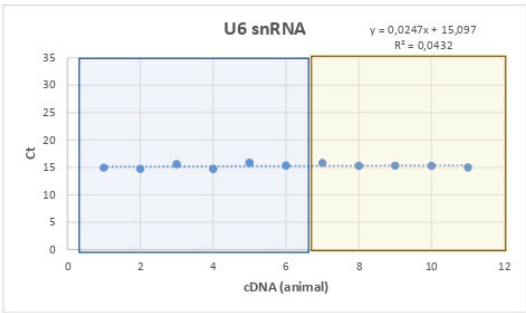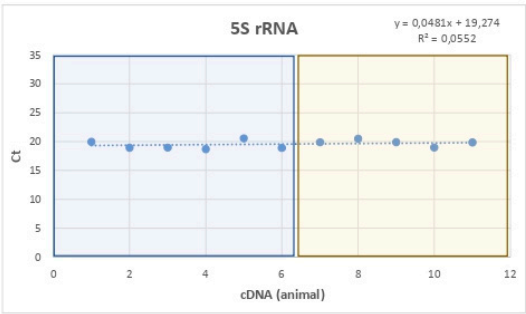

## 2. Table S2.

| <b>miR-21</b>  | <b>R308</b>    | <b>RG</b>      |
|----------------|----------------|----------------|
| <i>Tissue</i>  | <i>RE (FC)</i> | <i>RE (FC)</i> |
| Muscle         | 1,746          | 0,504          |
| Lung           | 1,176          | 1,952          |
| Spleen         | 1,498          | 1,227          |
| <b>miR-126</b> | <b>R308</b>    | <b>RG</b>      |
| <i>Tissue</i>  | <i>RE (FC)</i> | <i>RE (FC)</i> |
| Muscle         | 1,3            | 1,133          |
| Lung           | 1,025 **       | 3,024 **       |
| Spleen         | 2,079          | 1,594          |

RE, relative expression to internal control (see methods). FC, fold change.
